# Supplementary material
Source: MDPI journal article supplement (https://www.mdpi.com/2311-7524/10/2/191)
Supplement: s1 [file s1]

**Table S1.** Primer sequences in RT-qPCR.

| <b>Gene name</b>   | <b>Forward Primer (5'-3')</b> | <b>Reverse Primer (5'-3')</b> |
|--------------------|-------------------------------|-------------------------------|
| <i>FanSWEET1a</i>  | TCGAGTCCGTCTACGTGTTG          | TTCCTGGAGTTGCCGTGAAG          |
| <i>FanSWEET2a</i>  | AGAGTGTTGAGTTCATGCCCT         | GCCAATTGCACAATCCCCAAG         |
| <i>FanSWEET3b</i>  | GGTGGCCTCTGTAAGCATGT          | TCCCAGTAGTCCGTATGCCAT         |
| <i>FanSWEET4c</i>  | TGGTTGTTGCTGGACTGCAT          | TGGTGTGTAGCATCCCGAAAT         |
| <i>FanSWEET5a</i>  | TTCCCATTTGTCCATCCCGAC         | TTTTCGGCGTTTCTGGGGAG          |
| <i>FanSWEET7a</i>  | TCCTTGATTGTGGGCATCGT          | ACGGATGAGAGCGTATGCAG          |
| <i>FanSWEET9b</i>  | TGATGCCGTCTGTACCCCTT          | CGGCTGCAACGGAAATAACC          |
| <i>FanSWEET10a</i> | CTCGGGTATGGCTTGATGCT          | CCACATGACTGCACCCAATG          |
| <i>FanSWEET14</i>  | AGCTTCGGTGTGGTTCAGAT          | GGAGAAGGCAAAACCGTGAT          |
| <i>FanSWEET15a</i> | CAAAACGCTGTGCTGCTCAT          | CGGGGCACGGTATTCACTAT          |
| <i>FanSWEET17a</i> | CGTAAACGGCTTCGGAGTTC          | AGCTAGAGGTGAGGCGTACA          |
